# Supplementary material for: New Sesquiterpenoids from Ambrosia artemisiifolia L
Source: PubMed Central journal article supplement (PMC6272762; doi:10.3390/molecules20034450), 2015-03-10
Supplement: molecules-20-04450-s001.pdf [file molecules-20-04450-s001.pdf]

# Supporting Information of Compounds 1–3

Figure List:

- Figure S1.** HR-ESIMS of compound 1
- Figure S2.**  $^1\text{H}$ -NMR of compound 1
- Figure S3.**  $^{13}\text{C}$ -NMR of compound 1
- Figure S4.**  $^1\text{H}$ - $^1\text{H}$  COSY of compound 1
- Figure S5.** HSQC of compound 1
- Figure S6.** HMBC of compound 1
- Figure S7.** NOESY of compound 1
- Figure S8.** HR-ESIMS of compound 2
- Figure S9.**  $^1\text{H}$ -NMR of compound 2
- Figure S10.**  $^{13}\text{C}$ -NMR of compound 2
- Figure S11.**  $^1\text{H}$ - $^1\text{H}$  COSY of compound 2
- Figure S12.** HSQC of compound 2
- Figure S13.** HMBC of compound 2
- Figure S14.** NOESY of compound 2
- Figure S15.** HR-ESIMS of compound 3
- Figure S16.**  $^1\text{H}$ -NMR of compound 3
- Figure S17.**  $^{13}\text{C}$ -NMR of compound 3
- Figure S18.**  $^1\text{H}$ - $^1\text{H}$  COSY of compound 3
- Figure S19.** HSQC of compound 3
- Figure S20.** HMBC of compound 3
- Figure S21.** NOESY of compound 3

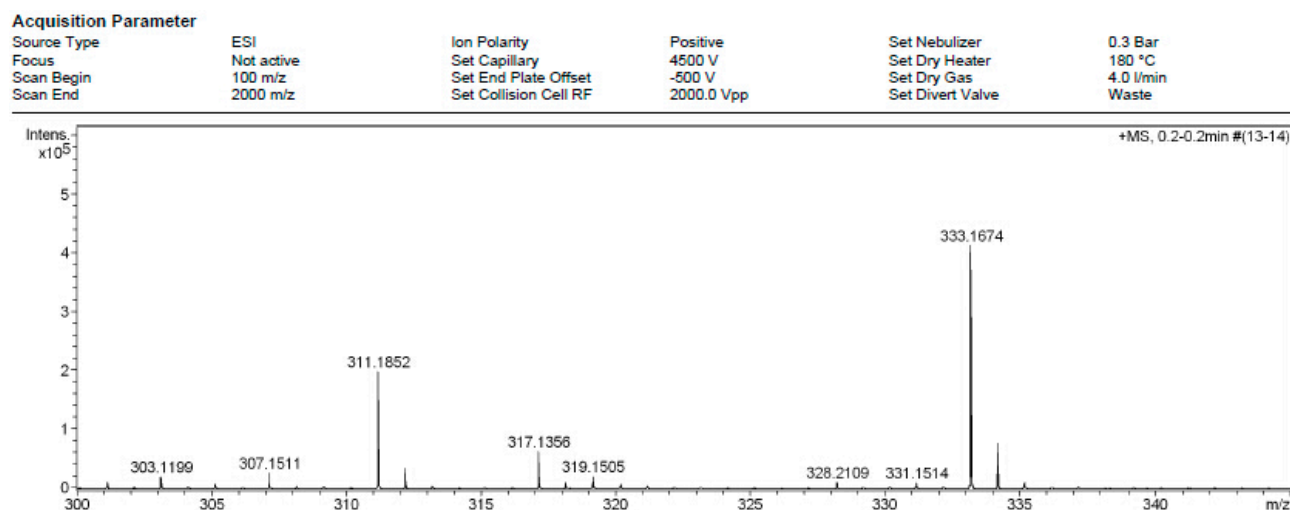

**Figure S1.** HR-ESIMS of compound 1.

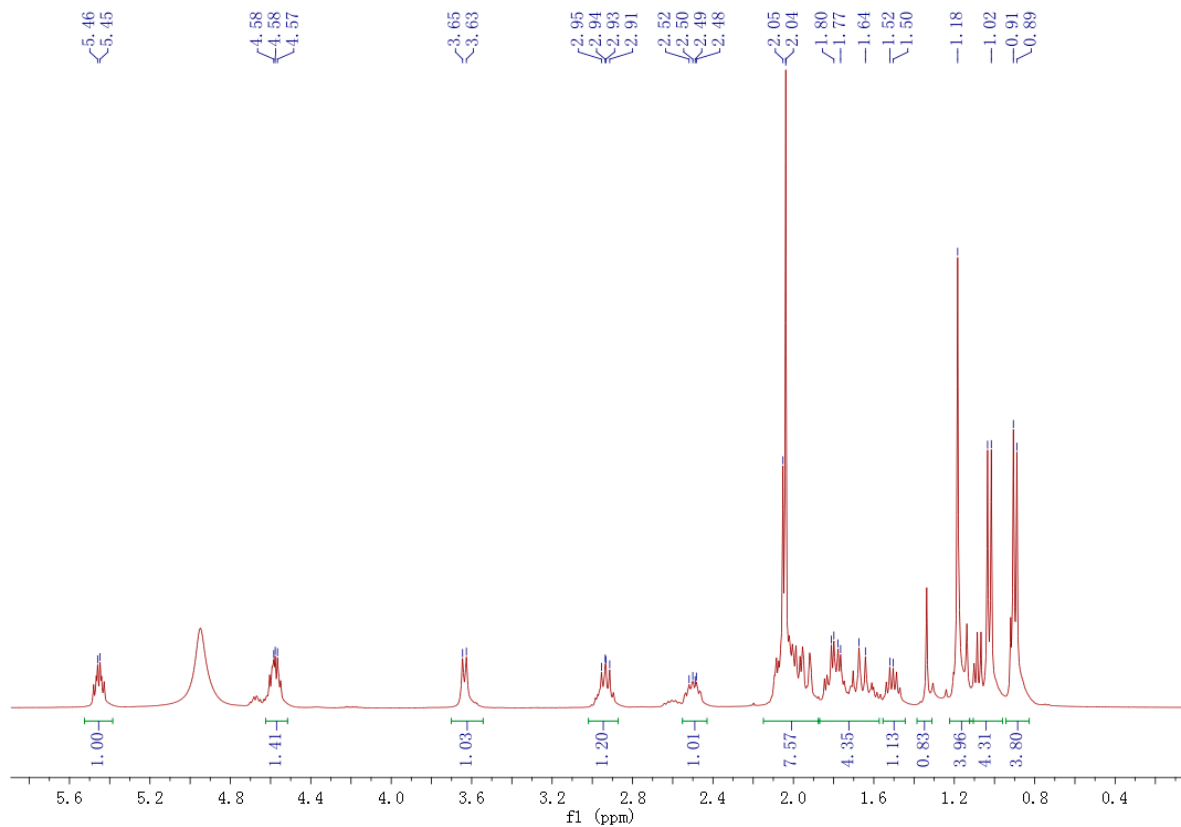

Figure S2.  $^1\text{H}$ -NMR of compound **1**.

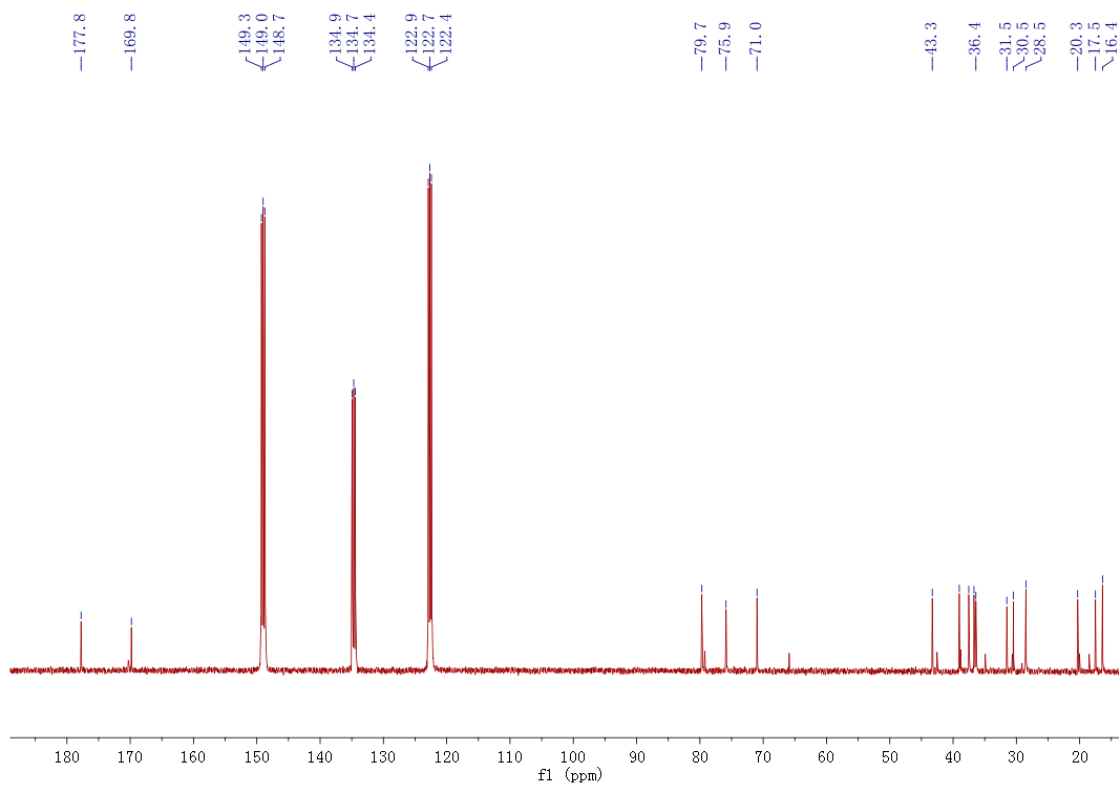

Figure S3.  $^{13}\text{C}$ -NMR of compound **1**.

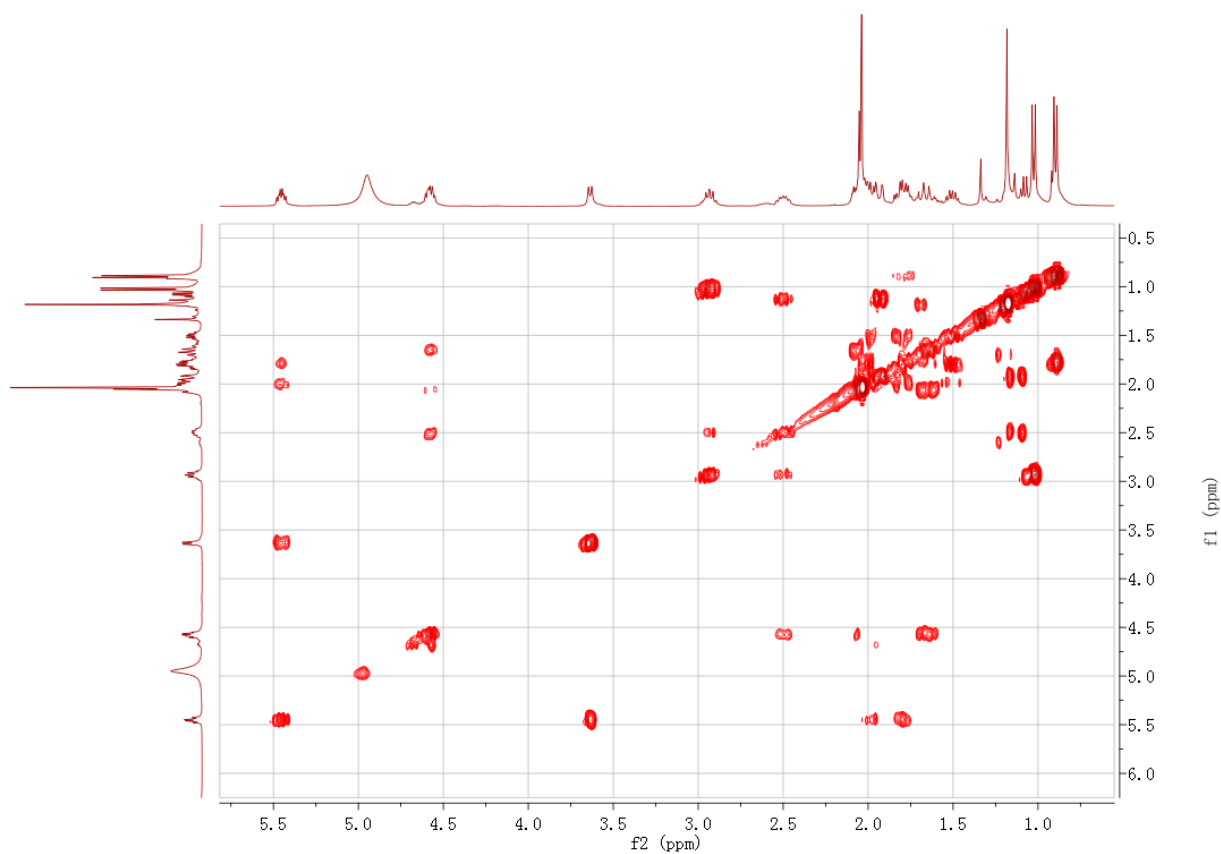

**Figure S4.**  $^1\text{H}$ - $^1\text{H}$  COSY of compound 1.

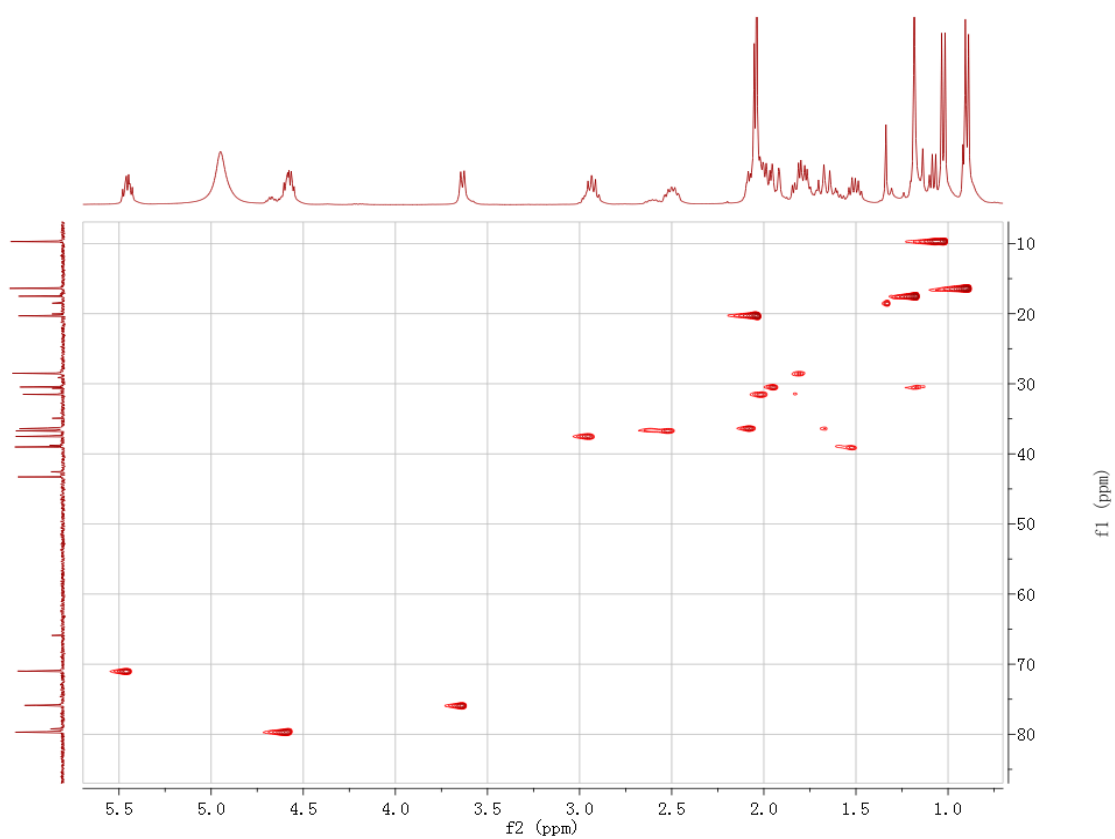

**Figure S5.** HSQC of compound 1.

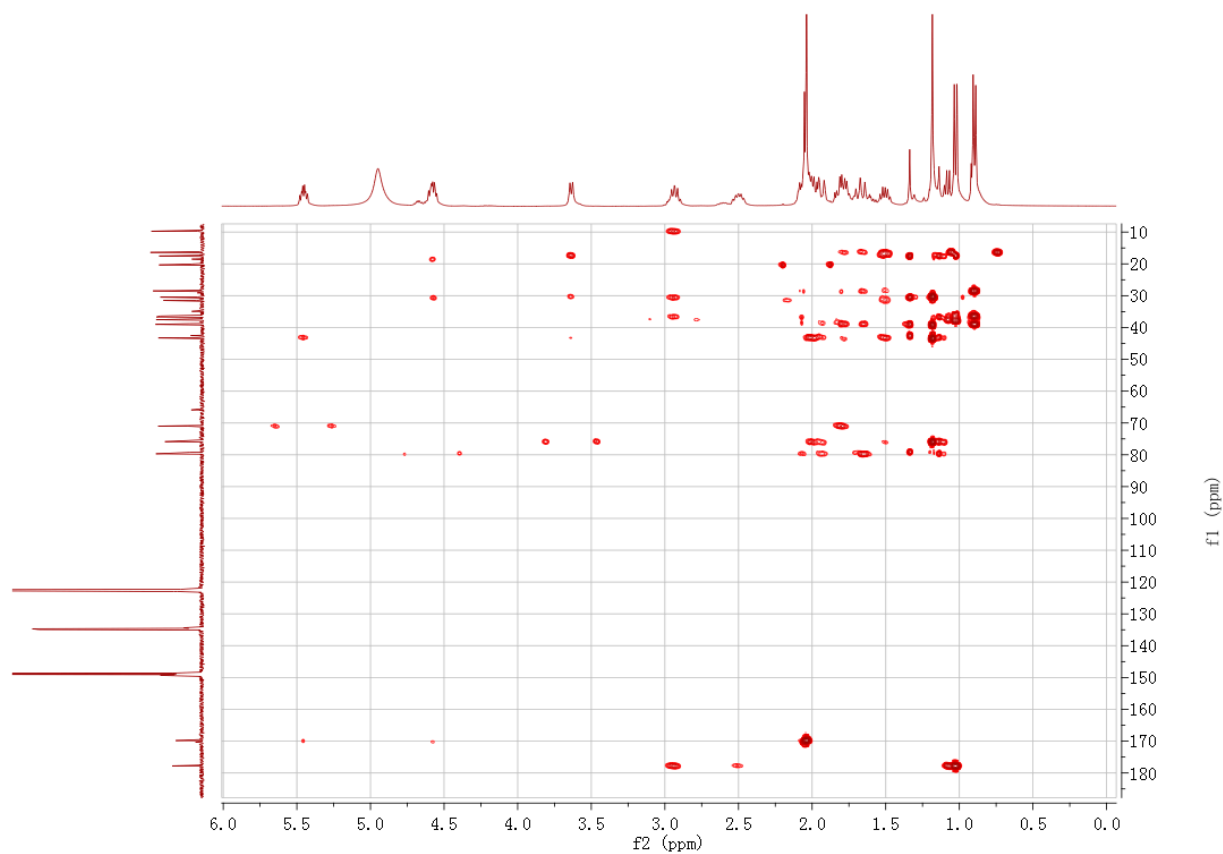

Figure S6. HMBC of compound 1.

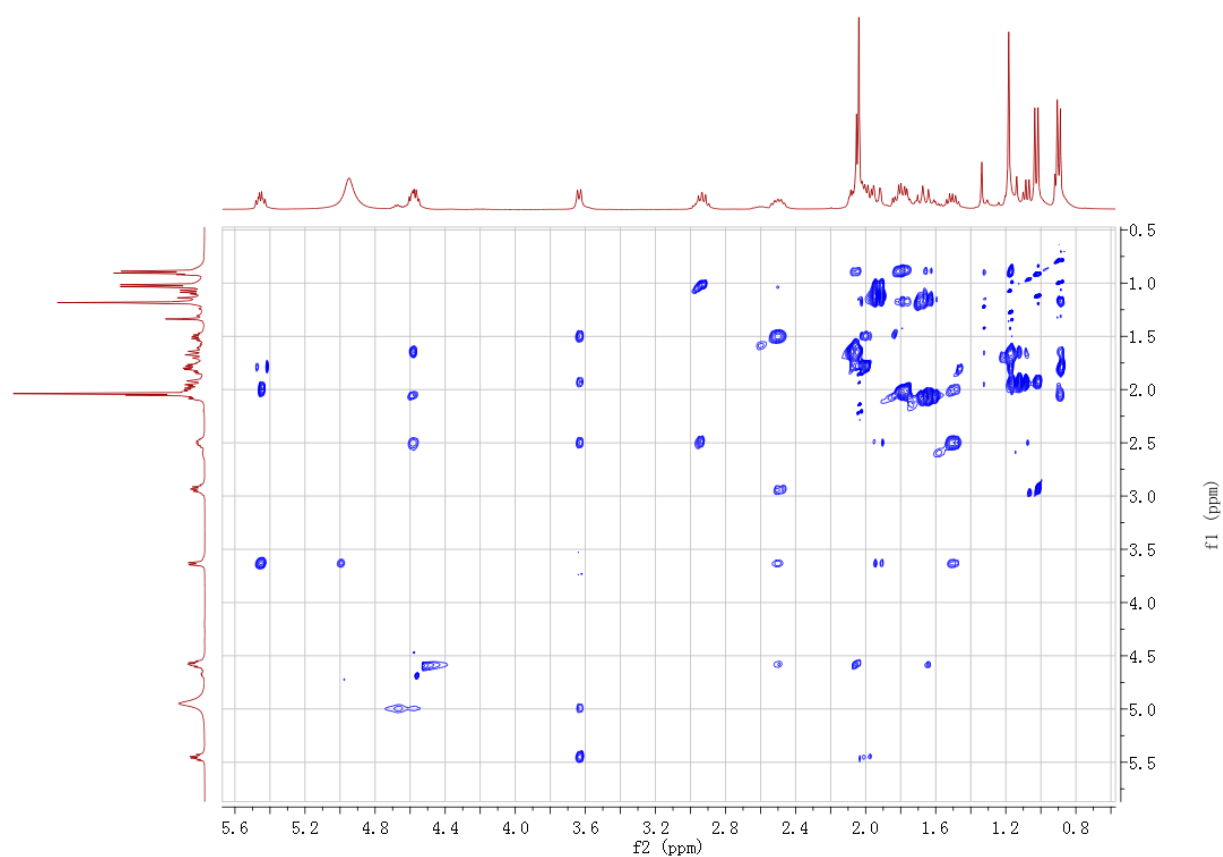

Figure S7. NOESY of compound 1.

## Acquisition Parameter

|             |            |                       |            |                  |           |
|-------------|------------|-----------------------|------------|------------------|-----------|
| Source Type | ESI        | Ion Polarity          | Positive   | Set Nebulizer    | 0.3 Bar   |
| Focus       | Not active | Set Capillary         | 4500 V     | Set Dry Heater   | 180 °C    |
| Scan Begin  | 100 m/z    | Set End Plate Offset  | -500 V     | Set Dry Gas      | 4.0 l/min |
| Scan End    | 2000 m/z   | Set Collision Cell RF | 2000.0 Vpp | Set Divert Valve | Waste     |

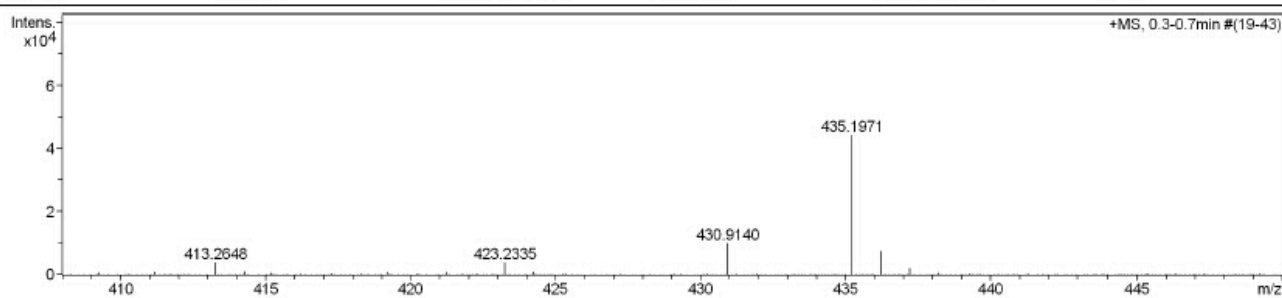

Figure S8. HR-ESIMS of compound 2.

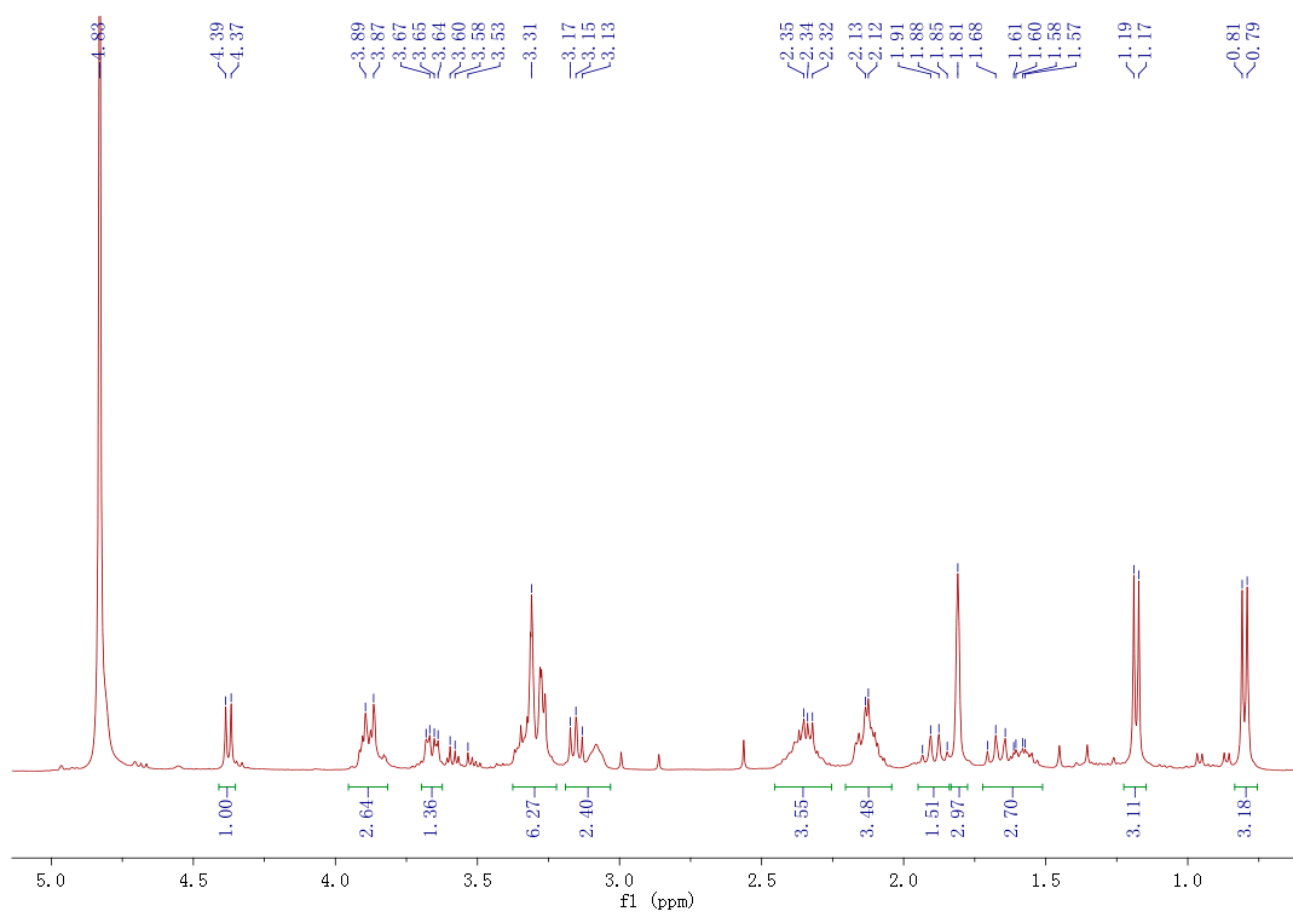Figure S9. <sup>1</sup>H-NMR of compound 2.

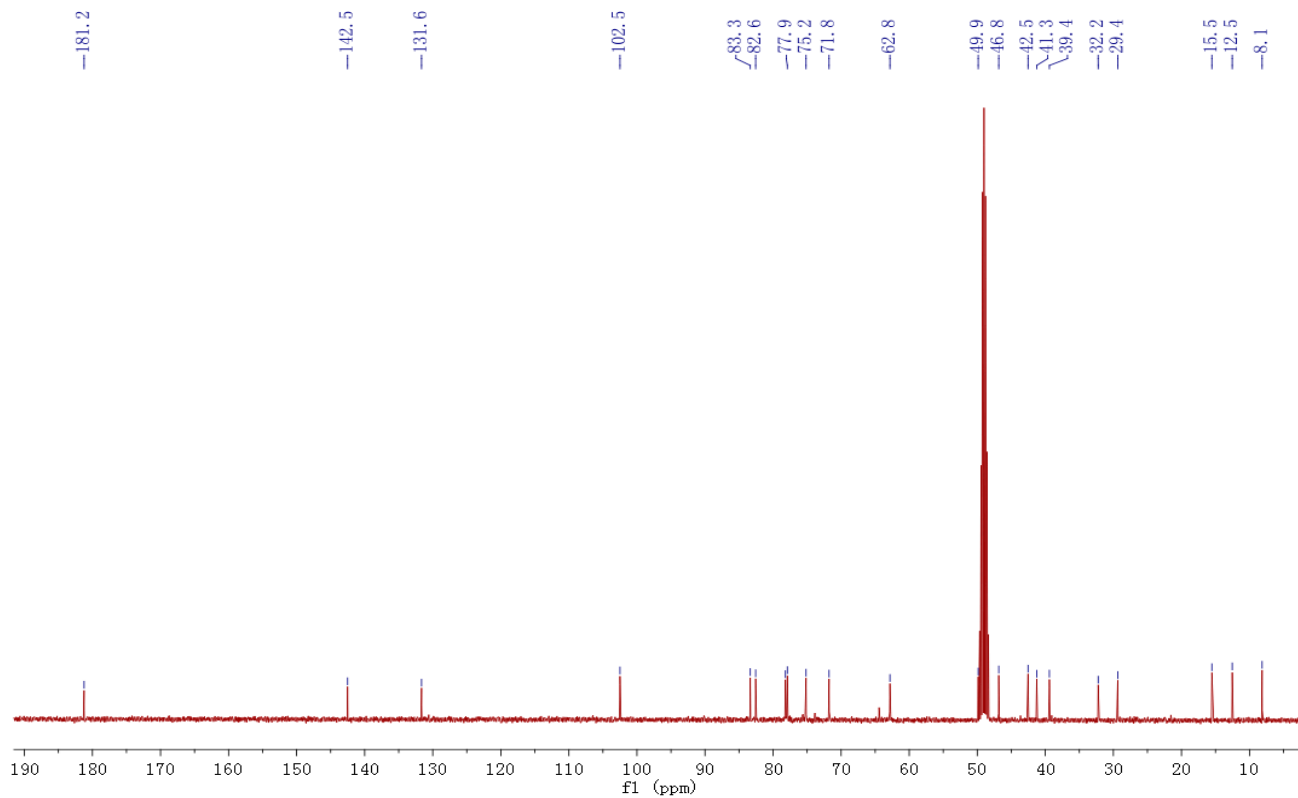

Figure S10.  $^{13}\text{C}$ -NMR of compound 2.

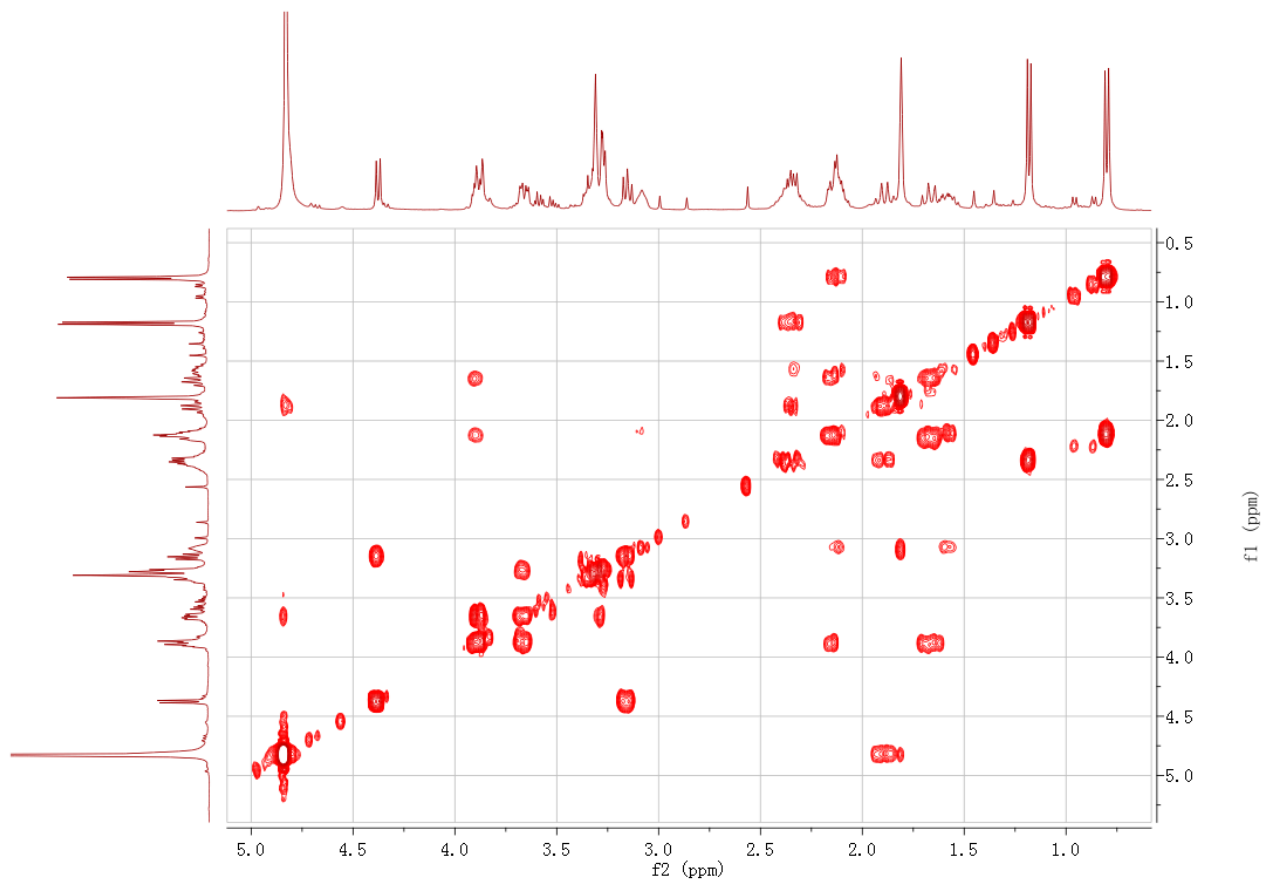

Figure S11.  $^1\text{H}$ - $^1\text{H}$  COSY of compound 2.

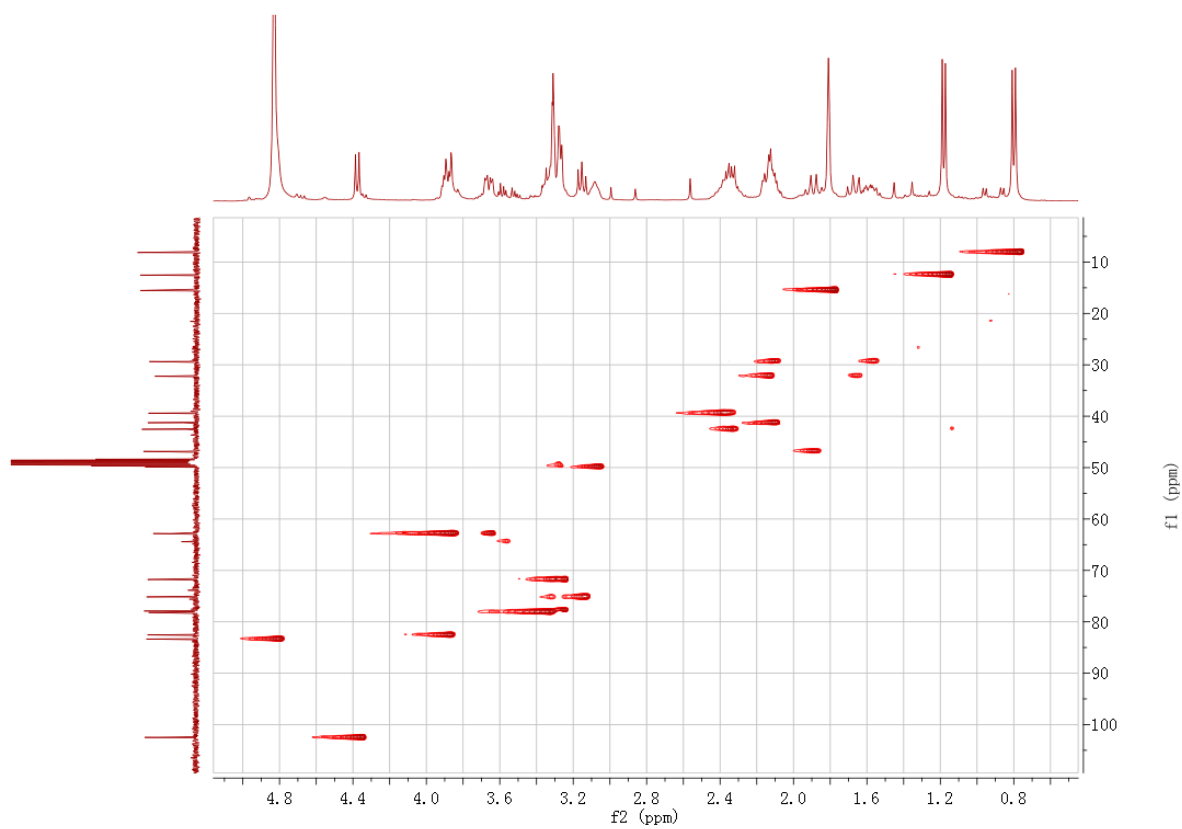

Figure S12. HSQC of compound 2.

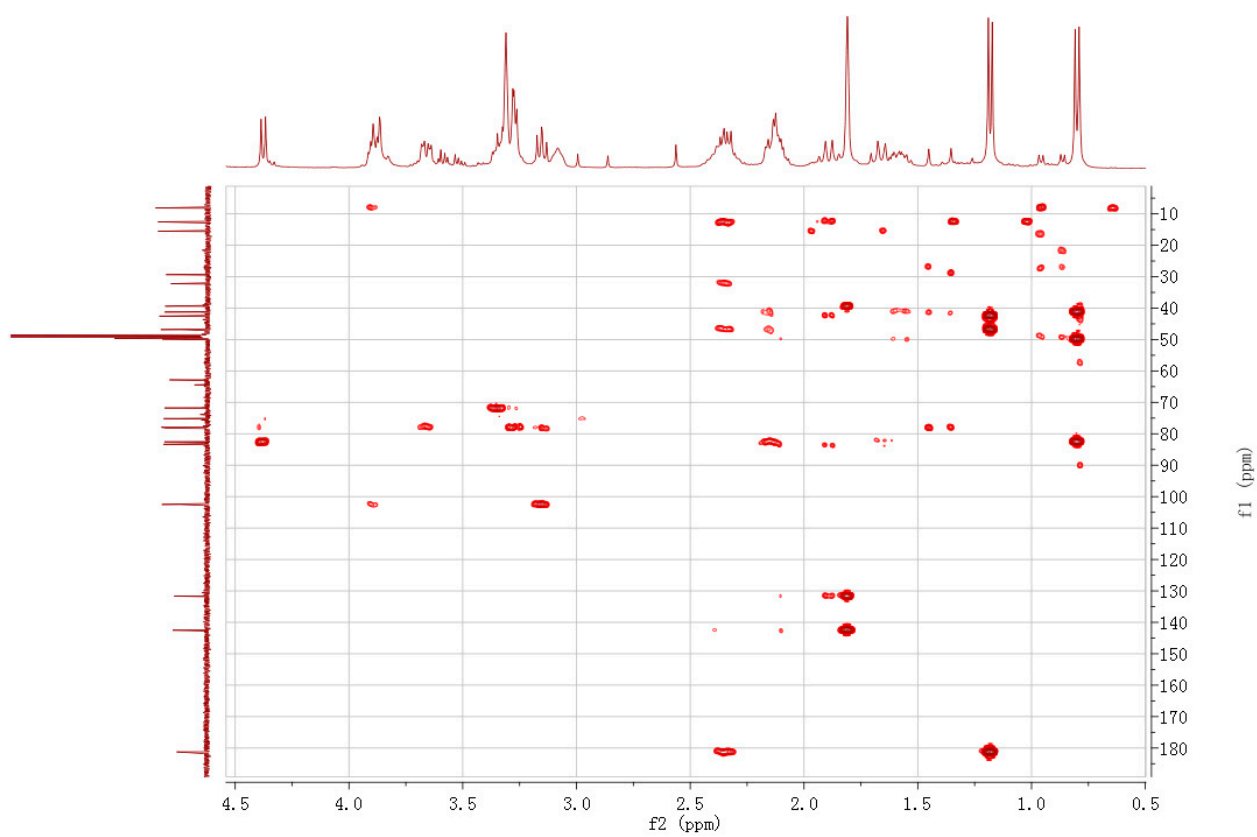

Figure S13. HMBC of compound 2.

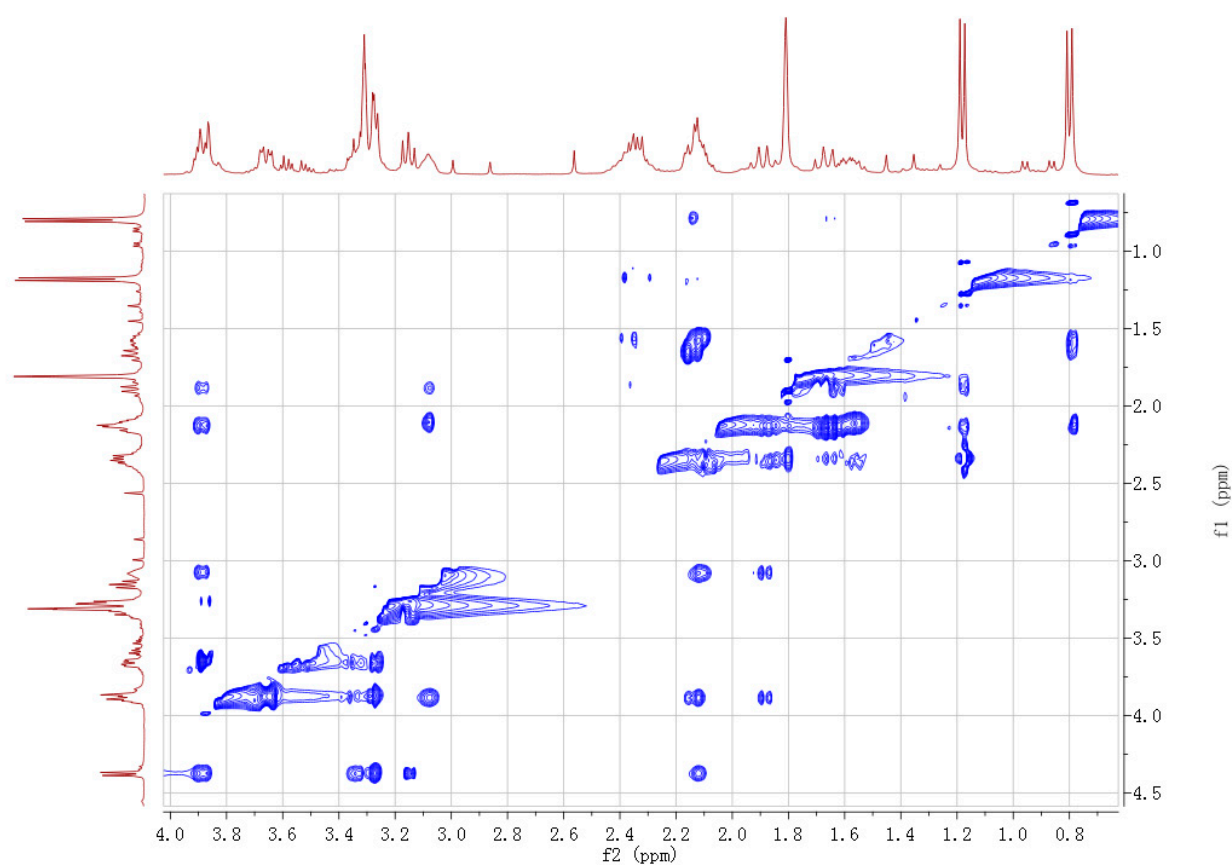

Figure S14. NOESY of compound 2.

Acquisition Parameter

|             |            |                       |            |                  |           |
|-------------|------------|-----------------------|------------|------------------|-----------|
| Source Type | ESI        | Ion Polarity          | Positive   | Set Nebulizer    | 0.3 Bar   |
| Focus       | Not active | Set Capillary         | 4500 V     | Set Dry Heater   | 180 °C    |
| Scan Begin  | 100 m/z    | Set End Plate Offset  | -500 V     | Set Dry Gas      | 4.0 l/min |
| Scan End    | 2000 m/z   | Set Collision Cell RF | 2000.0 Vpp | Set Divert Valve | Waste     |

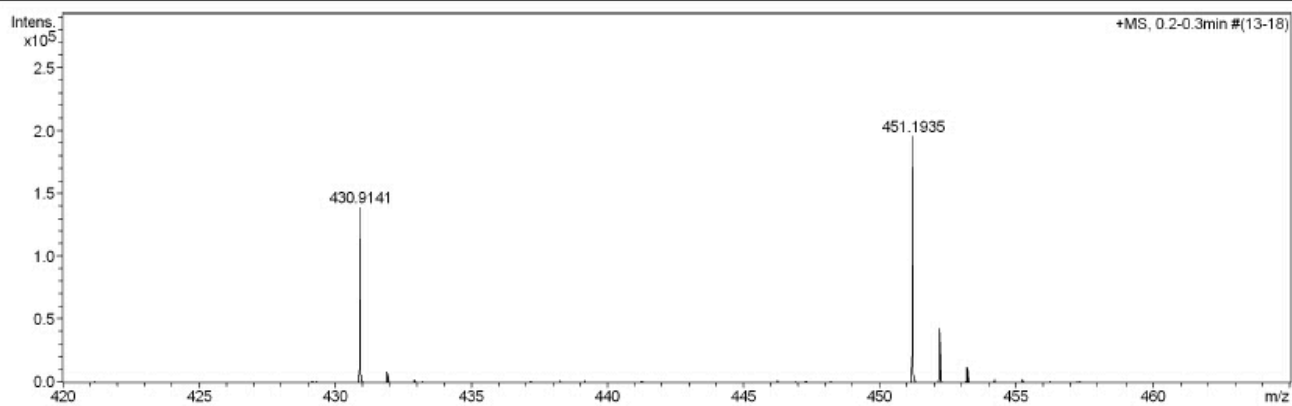

Figure S15. HR-ESIMS of compound 3.



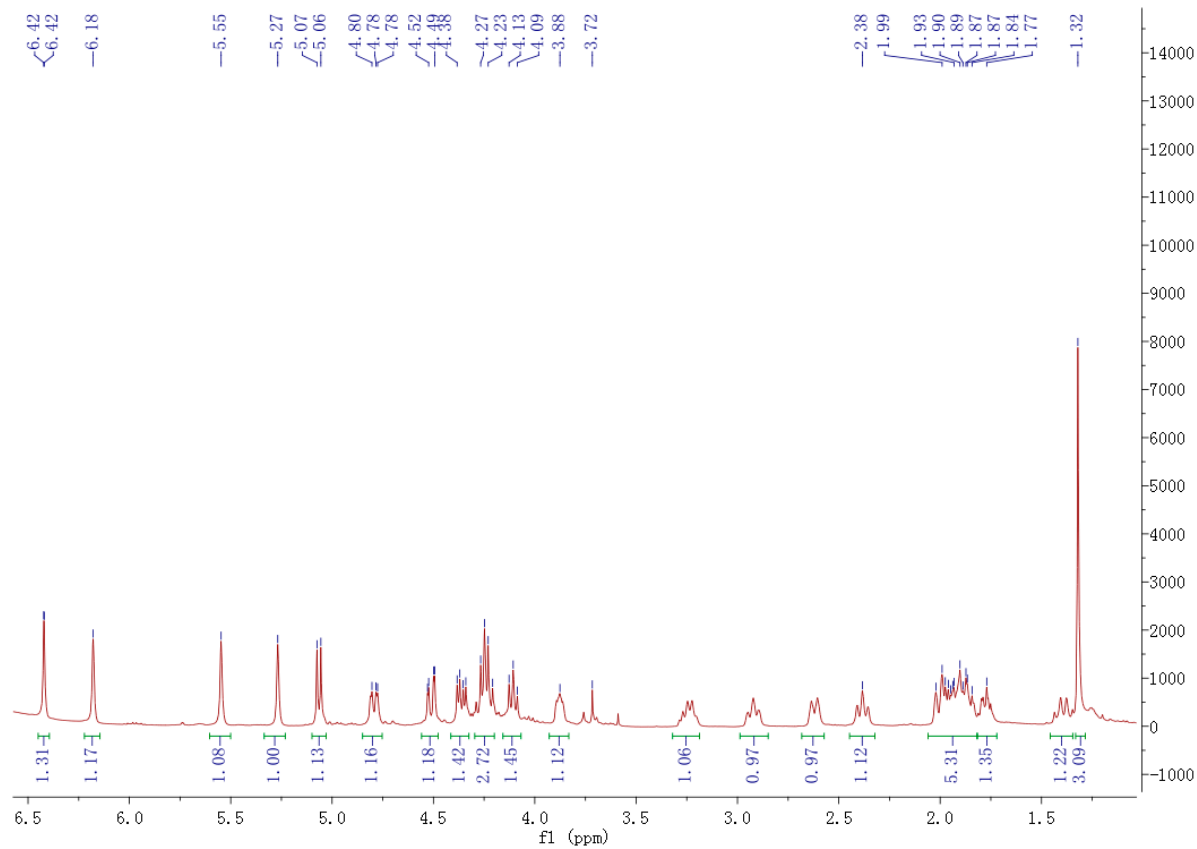

Figure S16.  $^1\text{H}$ -NMR of compound **3**.

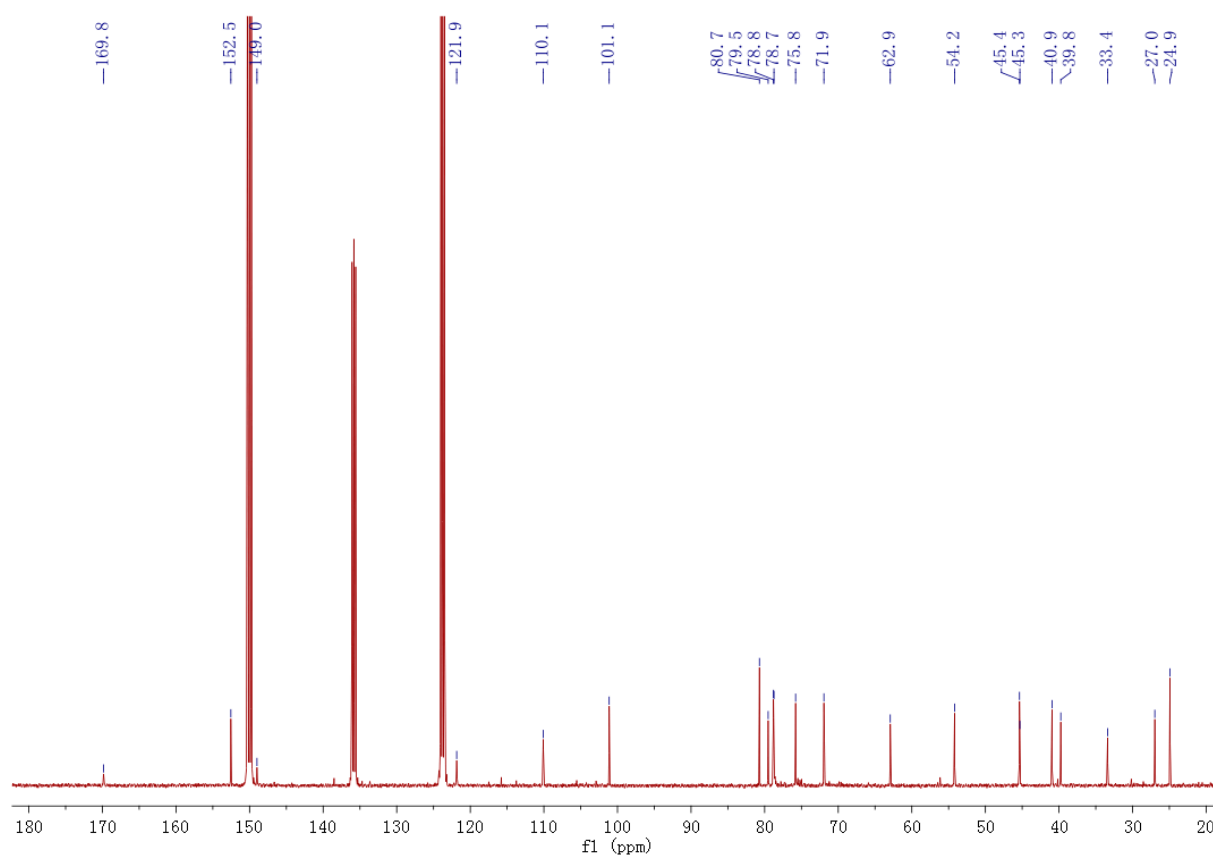

Figure S17.  $^{13}\text{C}$ -NMR of compound **3**.

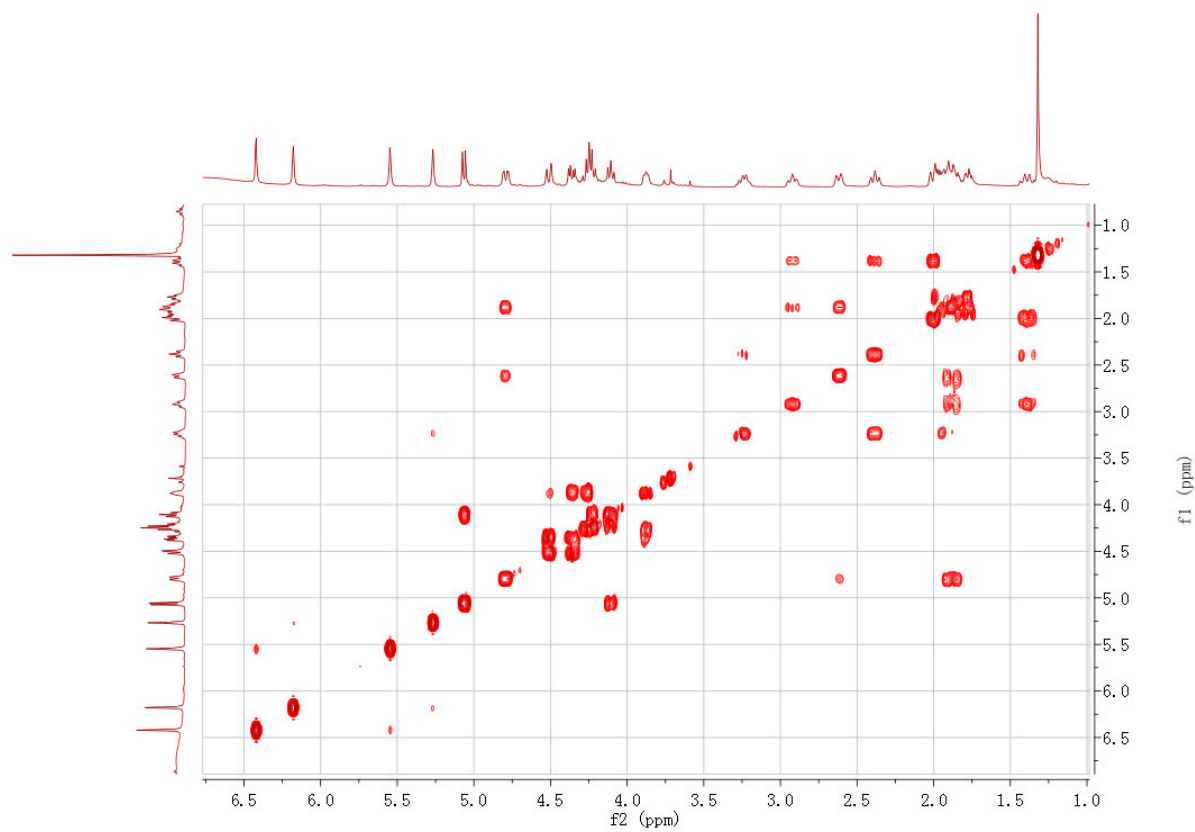

Figure S18.  $^1\text{H}$ - $^1\text{H}$  COSY of compound 3.

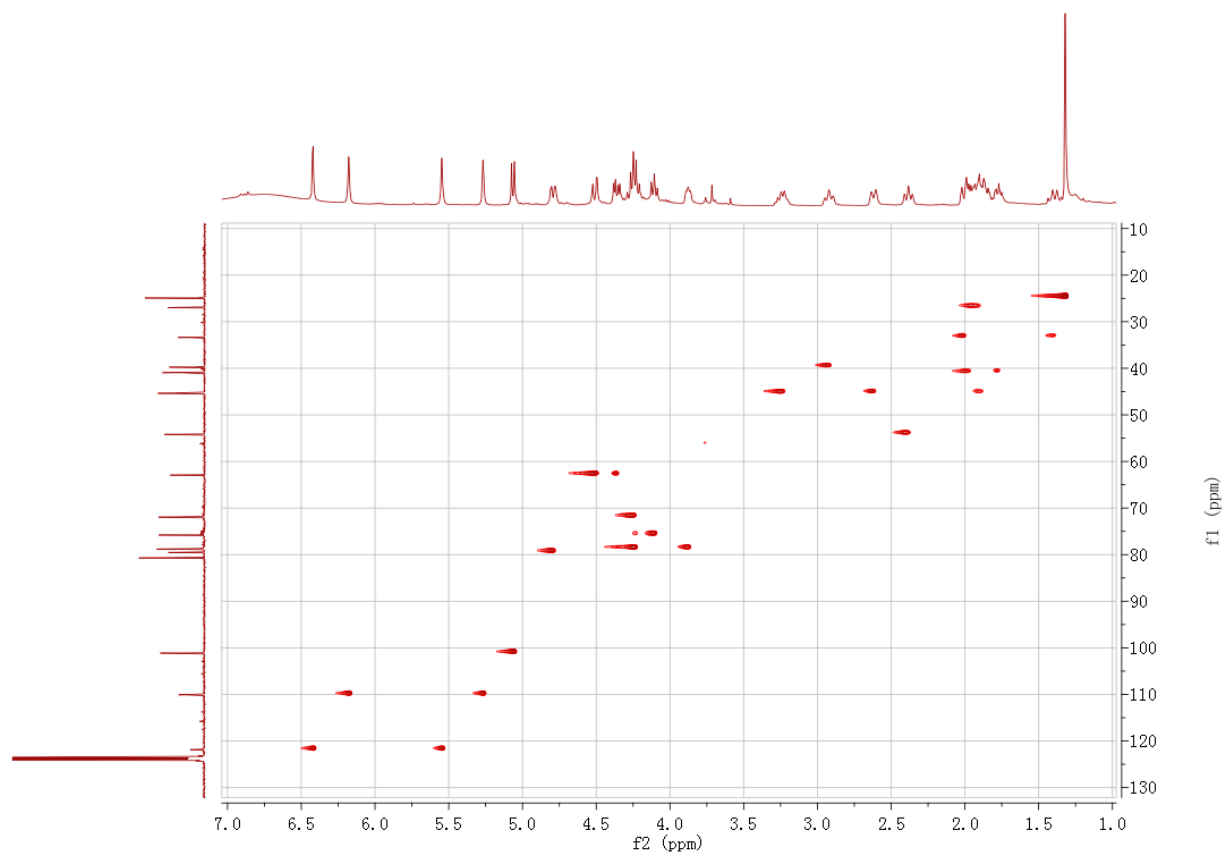

Figure S19. HSQC of compound 3.

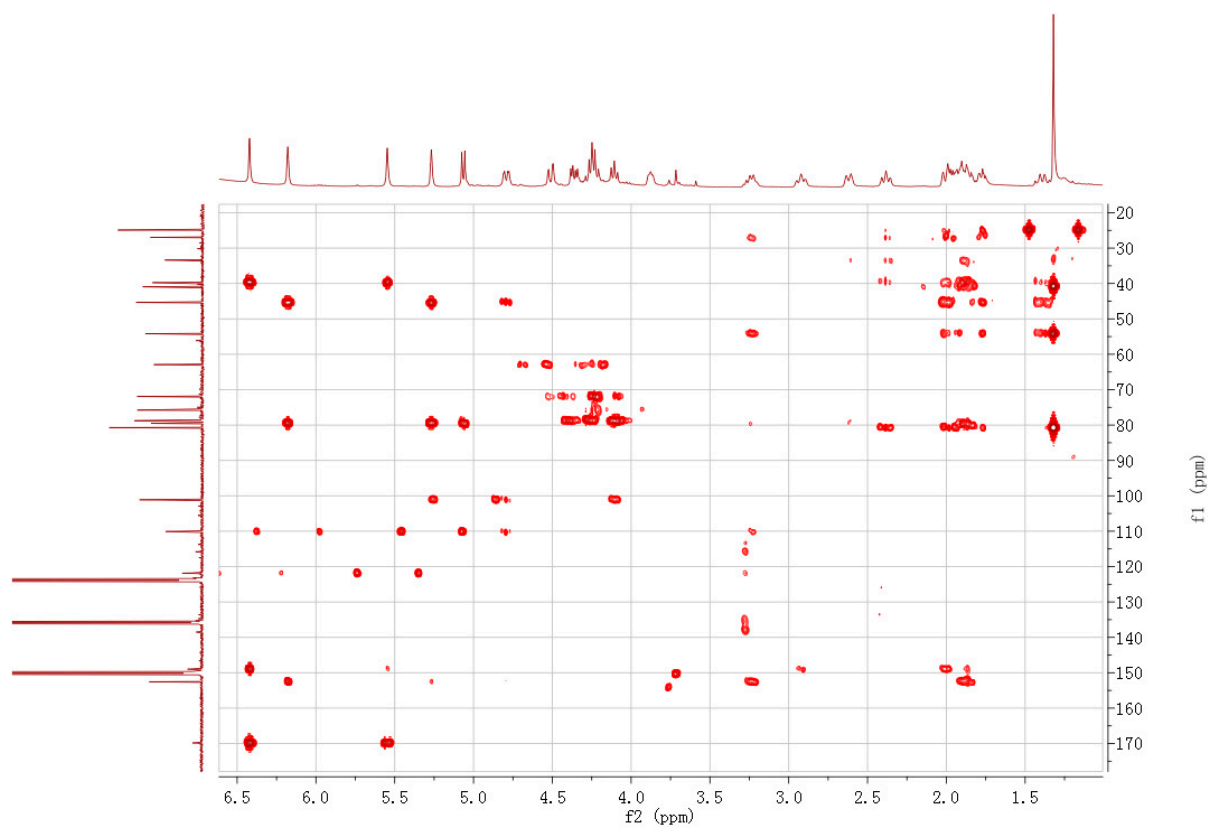

Figure S20. HMBC of compound 3.

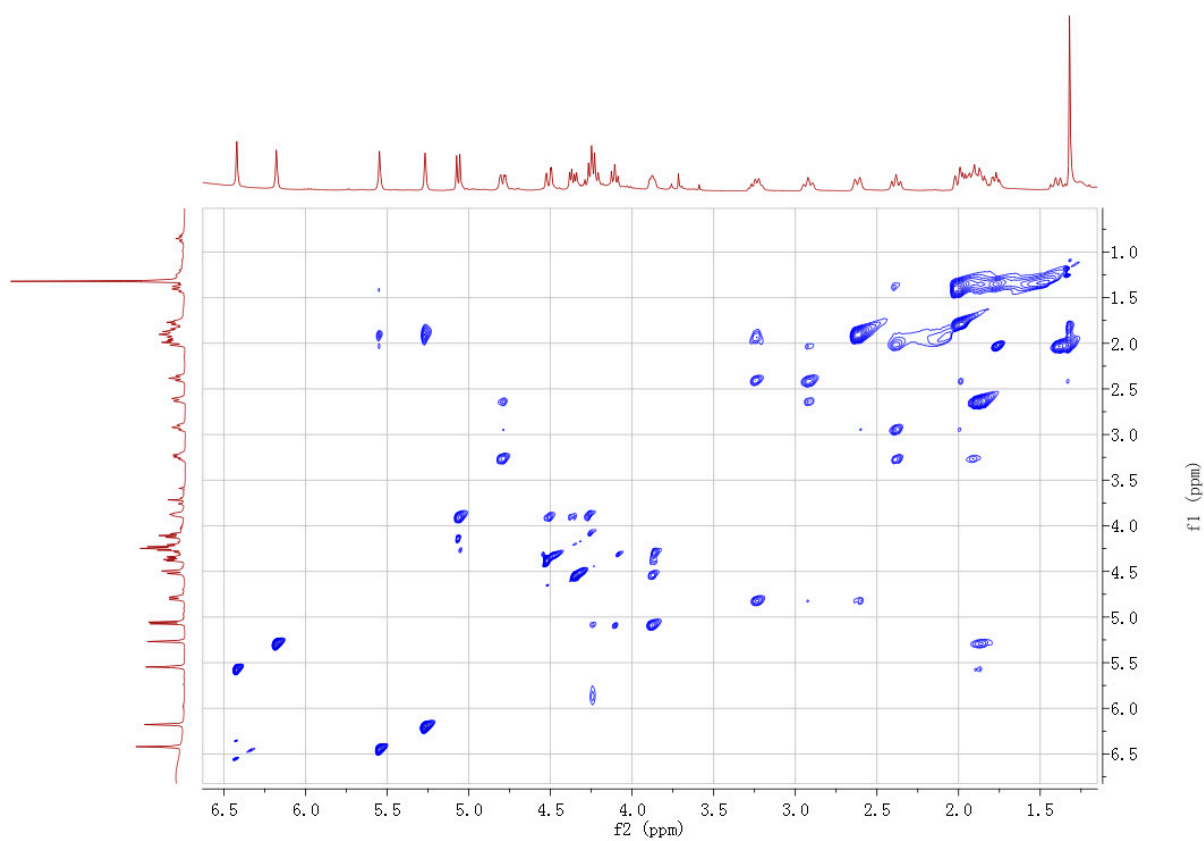

Figure S21. NOESY of compound 3.
